# Supplementary material for: Plasmonic Enhanced SERS in Ag/TiO2 Nanostructured Film: An Experimental and Theoretical Study
Source: MDPI journal article supplement (doi:10.3390/mi13101595), 2022-09-25
Supplement: s1 [file s1]

## Supplementary Materials

### Plasmonic enhanced SERS in Ag/TiO<sub>2</sub> nanostructured film: an experimental and theoretical study

Chawki Awada

Department of Physics, College of Science, King Faisal University, P.O. Box: 400, Al-Ahsa, 31982, Saudi Arabia

**Figure S1:** Mapping of the Raman intensity of the two peaks located at 480 and 1623 cm<sup>-1</sup>.

➤ Mapping of 480 cm<sup>-1</sup>

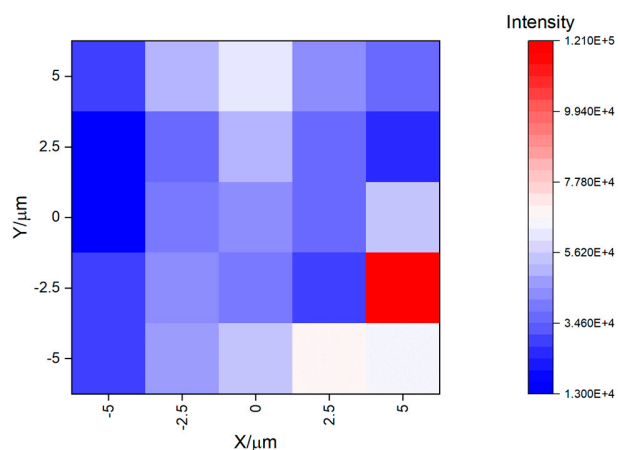

➤ Mapping at 1623 cm<sup>-1</sup>

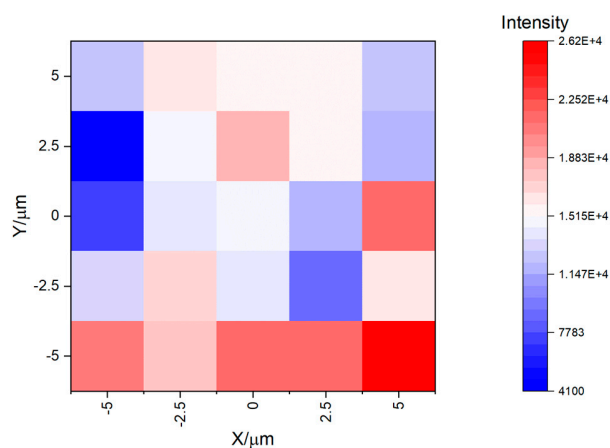

**Figure S2:** Fitting of Raman line located at 480 cm<sup>-1</sup> excited at different power density.

➤ 5%

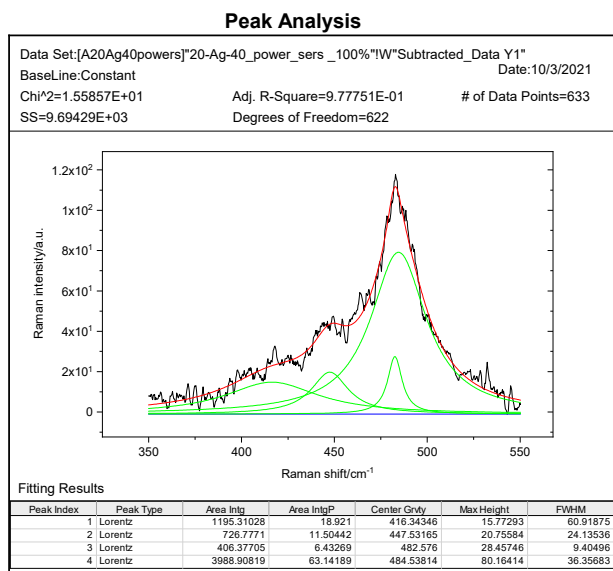

➤ 10%

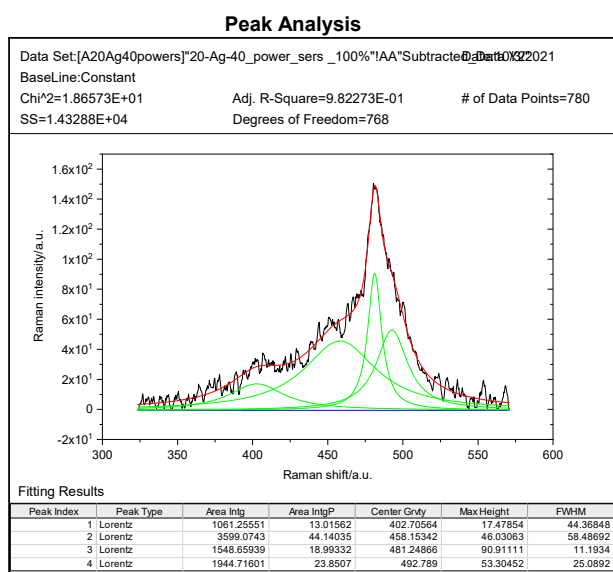

➤ 25%

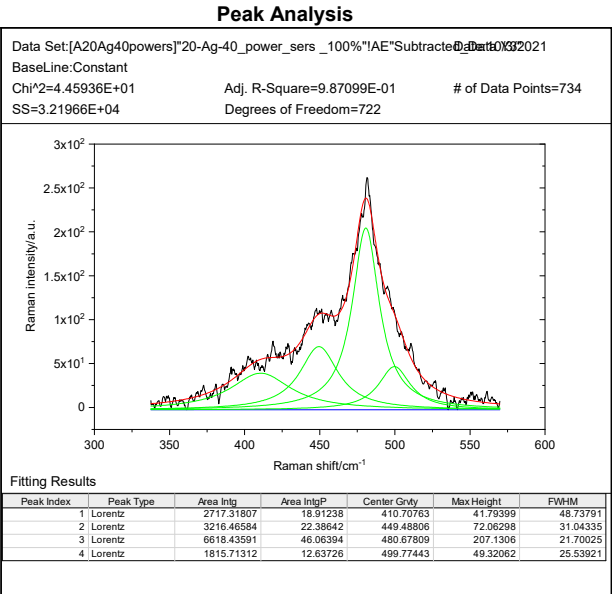

➤ 50%

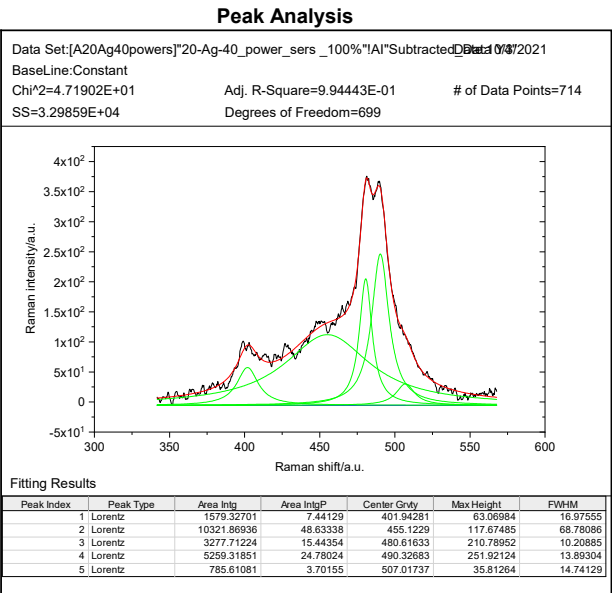

➤ 100%

### Peak Analysis

Data Set:[A20Ag40powers]\*20-Ag-40\_power\_sers\_100%"IAM"Subtracted Data  
BaseLine:Constant  
Chi²=6.78860E+01      Adj. R-Square=9.92990E-01      # of Data Points=643  
SS=4.28360E+04      Degrees of Freedom=631

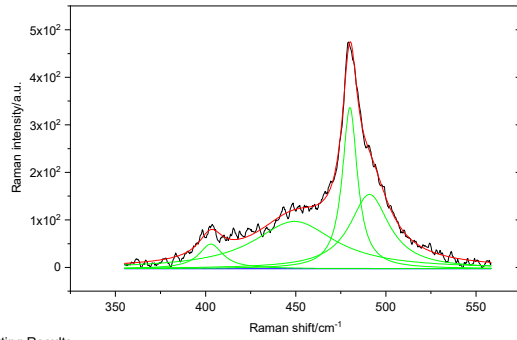

#### Fitting Results

| Peak Index | Peak Type | Area Intg  | Area IntgP | Center Grvty | Max Height | FWHM     |
|------------|-----------|------------|------------|--------------|------------|----------|
| 1          | Lorentz   | 1224.45579 | 6.29193    | 402.94973    | 51.79138   | 16.18129 |
| 2          | Lorentz   | 7124.78256 | 36.61107   | 449.34427    | 99.46514   | 54.84704 |
| 3          | Lorentz   | 5209.03045 | 26.76688   | 480.04365    | 339.0889   | 10.11773 |
| 4          | Lorentz   | 5902.4625  | 30.33012   | 490.90891    | 156.28895  | 28.49933 |
